# Supplementary material for: Ligand-Free Silver Nanoparticles: An Innovative Strategy against Viruses and Bacteria
Source: MDPI journal article supplement (doi:10.3390/microorganisms12040820), 2024-04-18
Supplement: s1 [file s1]

**Supplementary Table S1.** Number of PLAL-AgNPs in  $\mu\text{L}$  of sample.

| AgNPs microliters ( $\mu\text{L}$ ) | AgNPs number      |
|-------------------------------------|-------------------|
| 100                                 | $2.3 \times 10^7$ |
| 50                                  | $1.2 \times 10^7$ |
| 25                                  | $5.8 \times 10^6$ |
| 12.5                                | $2.9 \times 10^6$ |
| 6.3                                 | $1.6 \times 10^6$ |
| 3.1                                 | $7.2 \times 10^5$ |
| 1.6                                 | $3.6 \times 10^5$ |
| 0.8                                 | $1.8 \times 10^5$ |

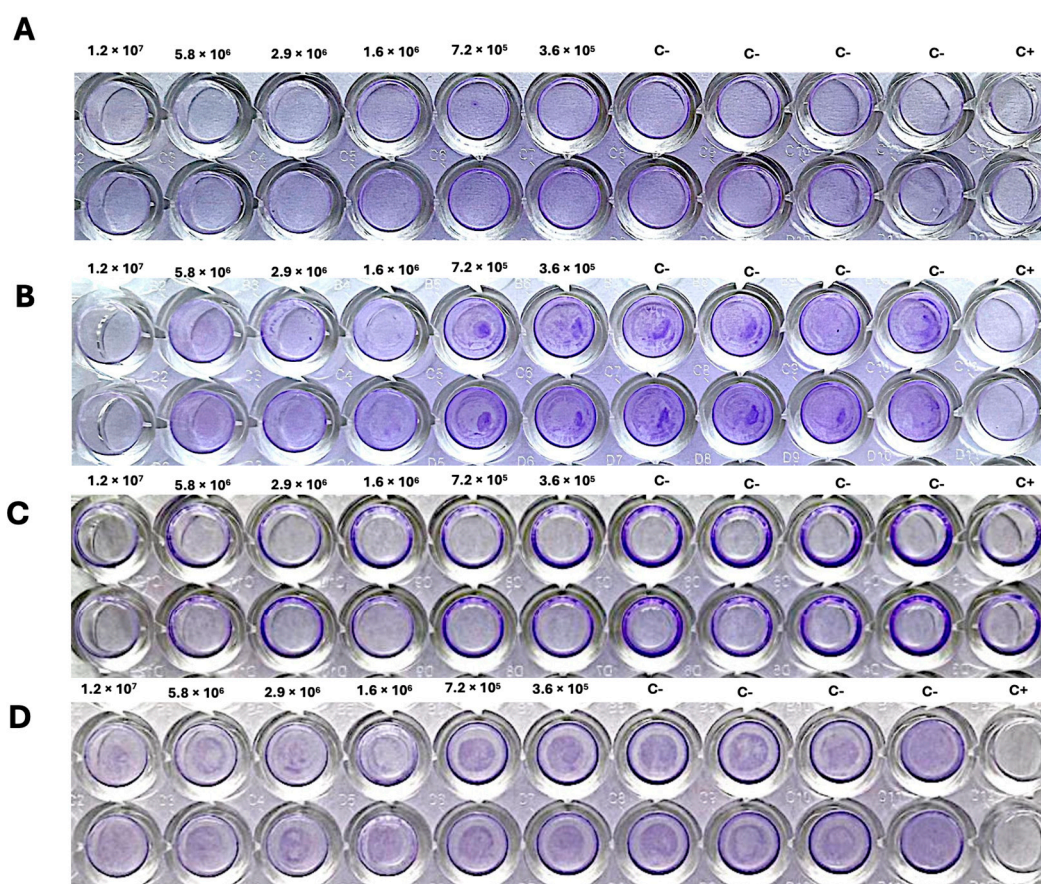

**Supplementary Figure S1.** Inhibition (A and C) and degradation (B and D) assay of *S. aureus* ATCC 25923 and *E. coli* ATCC 25992 biofilms exposed to AgNPs.
